# Supplementary material
Source: HighWire-hosted journal article supplement (https://qualitysafety.bmj.com/content/27/8/611)
Supplement: inline-supplementary-material-1 [file inline-supplementary-material-1.docx]

| **Parameter** | **Greater London compared with the rest of England (excluding Manchester)** | | **HASUs compared with the rest of England (excluding Manchester)** | |
| --- | --- | --- | --- | --- |
| **Estimate (SE)** | **p-value** | **Estimate (SE)** | **p-value** |
|  | Seven-day in-hospital mortality | | | |
| Intercept | 0.044  (0.010) | <.0001 | 0.053  (0.012) | <.0001 |
| Admission time (quarter) | -0.002  (0.001) | 0.0626 | -0.003  (0.001) | 0.0043 |
| Area | -0.006  (0.012) | 0.6134 | -0.002  (0.015) | 0.8917 |
| Policy | 0.008  (0.0152) | 0.6042 | 0.024  (0.019) | 0.1959 |
| Area*Policy | -0.007  (0.015) | 0.6472 | -0.017  (0.018) | 0.3567 |
|  | Thirty-day in-hospital mortality | | | |
| Intercept | 0.021  (0.005) | <.0001 | 0.022  (0.006) | 0.0003 |
| Admission time (quarter) | -0.001  (0.0004) | 0.0584 | -0.001  (0.001) | 0.0383 |
| Area | -0.002  (0.007) | 0.7604 | -0.007  (0.008) | 0.3528 |
| Policy | 0.008  (0.008) | 0.3222 | 0.012  (0.010) | 0.2200 |
| Area*Policy | 0.0003  (0.008) | 0.9675 | 0.003  (0.009) | 0.7856 |
| Estimate unit is death per admission | | | | |

**Supplement table 1. Results of the regression analysis assessing the effect of time, area and policy on the difference between weekend/weekday for seven and thirty-day in-hospital mortality (SE- coefficient standard errors)**

**Supplement figure 1. The difference of adjusted in-hospital mortality rates between weekend/weekday by quarter (vertical grey line presents the time when stroke services were reorganised)**

**
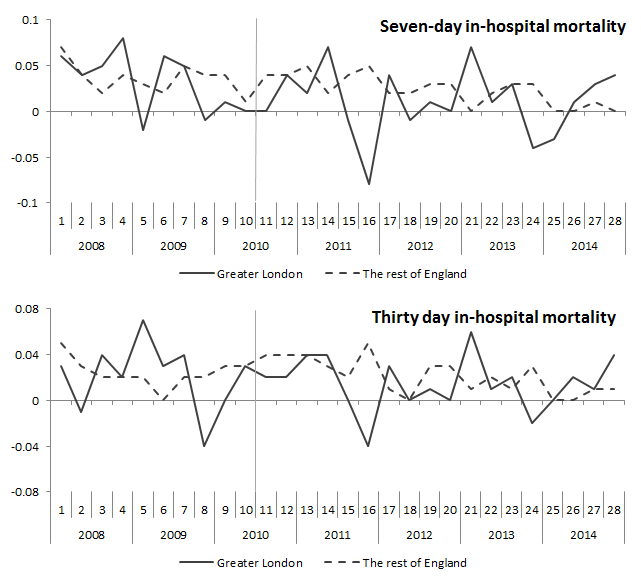
**

**Supplement figure 2. The change of the number of emergency hospital admissions in hyper acute stroke units (HASUs) as a percentage of all hospital admissions in Greater London by quarter**

**
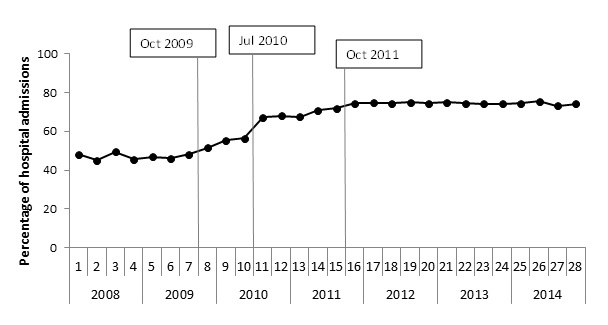
**

**Supplement table 2. Results of the regression analysis assessing the effect of time, area and policy on the difference between weekend/weekday for seven and thirty-day in-hospital mortality (SE- coefficient standard errors) (assuming that the introduction of**

**centralisation started in Oct 2009)**

| **Parameter** | **Greater London compared with the rest of England** | | **HASUs compared with the rest of England** | |
| --- | --- | --- | --- | --- |
| **Estimate (SE)** | **p-value** | **Estimate (SE)** | **p-value** |
|  | Seven-day in-hospital mortality | | | |
| Intercept | 0.045  (0.005) | <0.001 | 0.043  (0.010) | <0.001 |
| Admission time (quarter) | -0.002  (0.0004) | <0.001 | -0.002  (0.0004) | <0.001 |
| Area | 0.007  (0.015) | 0.617 | 0.022  (0.021) | 0.306 |
| Policy | 0.008  (0.008) | 0.328 | 0.010  (0.009) | 0.231 |
| Area*Policy | -0.022  (0.017) | 0.178 | -0.042  (0.024) | 0.077 |
|  | Thirty-day in-hospital mortality | | | |
| Intercept | 0.012  (0.002) | <0.001 | 0.013  (0.002) | <0.001 |
| Admission time (quarter) | -0.001  (0.0002) | 0.001 | -0.001  (0.0002) | <0.001 |
| Area | 0.007  (0.006) | 0.235 | 0.007  (0.009) | 0.423 |
| Policy | 0.009  (0.004) | 0.139 | 0.012  (0.004) | 0.072 |
| Area*Policy | -0.010  (0.007) | 0.172 | -0.015  (0.010) | 0.146 |
| Estimate unit is death per admission | | | | |

**Supplement table 3. Results of the regression analysis assessing the effect of time, area and policy on the difference between weekend/weekday for seven and thirty-day in-hospital mortality (SE- coefficient standard errors) (assuming that the introduction of**

**centralisation started in Oct 2011)**

| **Parameter** | **Greater London compared with the rest of England** | | **HASUs compared with the rest of England** | |
| --- | --- | --- | --- | --- |
| **Estimate (SE)** | **p-value** | **Estimate (SE)** | **p-value** |
|  | Seven-day in-hospital mortality | | | |
| Intercept | 0.048  (0.006) | <0.001 | 0.047  (0.006) | <0.001 |
| Admission time (quarter) | -0.001  (0.001) | 0.018 | -0.001  (0.001) | 0.025 |
| Area | -0.008  (0.010) | 0.452 | -0.005  (0.014) | 0.728 |
| Policy | 0.001  (0.001) | 0.938 | 0.004  (0.010) | 0.689 |
| Area*Policy | -0.005  (0.014) | 0.734 | -0.014  (0.018) | 0.447 |
|  | Thirty-day in-hospital mortality | | | |
| Intercept | 0.014  (0.003) | <0.001 | 0.016  (0.003) | <0.001 |
| Admission time (quarter) | -0.0003  (0.0003) | 0.24 | -0.0004  (0.0003) | 0.188 |
| Area | 0.001  (0.004) | 0.760 | -0.001  (0.006) | 0.859 |
| Policy | 0.001  (0.004) | 0.897 | 0.002  (0.005) | 0.713 |
| Area*Policy | -0.003  (0.006) | 0.653 | -0.007  (0.008) | 0.436 |
| Estimate unit is death per admission | | | | |
